# Supplementary material for: Postnatal growth of preterm infants during the first two years of life: catch-up growth accompanied by risk of overweight
Source: Springer Nature journal article supplement (doi:10.1186/s13052-021-01019-2), 2021-03-16
Supplement: MOESM1 [file 18971888]

Additional file 1. Growth of preterm infants from CA 40 weeks to 24 months compared with the WHO standards (mean±SD)

| Age           | N    | Weight (kg) |              |          |          | Length/height (cm) |              |          |          |
|---------------|------|-------------|--------------|----------|----------|--------------------|--------------|----------|----------|
|               |      | Study data  | WHO standard | <i>t</i> | <i>P</i> | Study data         | WHO standard | <i>t</i> | <i>P</i> |
| <b>Male</b>   |      |             |              |          |          |                    |              |          |          |
| CA 40 weeks   | 4661 | 4.87±0.89   | 3.40±0.50    | 47.85    | <0.001   | 55.19±2.83         | 49.90±1.90   | 53.59    | <0.001   |
| CA 3 months   | 4835 | 7.10±0.95   | 6.45±0.75    | 13.64    | <0.001   | 62.68±2.58         | 61.45±2.05   | 9.51     | <0.001   |
| CA 6 months   | 4130 | 8.47±1.01   | 7.95±0.85    | 10.08    | <0.001   | 68.03±2.51         | 67.65±2.15   | 3.01     | 0.003    |
| CA 9 months   | 3751 | 9.47±1.08   | 8.95±0.95    | 9.41     | <0.001   | 72.36±2.50         | 71.95±2.25   | 3.20     | 0.001    |
| CA 12 months  | 3624 | 10.22±1.12  | 9.70±1.10    | 8.90     | <0.001   | 76.03±2.51         | 75.75±2.35   | 2.18     | 0.029    |
| CA 18 months  | 3241 | 11.45±1.21  | 11.00±1.20   | 7.15     | <0.001   | 82.68±2.94         | 82.30±2.70   | 2.51     | 0.012    |
| CA 24 months  | 1583 | 12.77±1.38  | 12.20±1.40   | 15.81    | <0.001   | 88.44±3.06         | 87.85±3.05   | 3.52     | <0.001   |
| <b>Female</b> |      |             |              |          |          |                    |              |          |          |
| CA 40 weeks   | 3741 | 4.45±0.79   | 3.25±0.45    | 42.45    | <0.001   | 53.86±2.73         | 49.15±1.85   | 47.66    | <0.001   |
| CA 3 months   | 3873 | 6.49±0.87   | 5.90±0.70    | 13.82    | <0.001   | 61.02±2.57         | 59.80±2.10   | 9.67     | <0.001   |
| CA 6 months   | 3394 | 7.84±0.92   | 7.35±0.85    | 10.65    | <0.001   | 66.35±2.41         | 65.75±2.25   | 4.99     | <0.001   |
| CA 9 months   | 3007 | 8.83±0.98   | 8.30±1.00    | 10.63    | <0.001   | 70.77±2.44         | 70.15±2.45   | 5.02     | <0.001   |
| CA 12 months  | 2862 | 9.59±1.04   | 9.00±1.10    | 11.09    | <0.001   | 74.54±2.46         | 74.00±2.60   | 4.30     | <0.001   |
| CA 18 months  | 2613 | 10.81±1.15  | 10.35±1.25   | 7.71     | <0.001   | 81.32±2.80         | 80.70±2.90   | 4.31     | <0.001   |
| CA 24 months  | 1241 | 12.17±1.30  | 11.60±1.40   | 7.80     | <0.001   | 87.26±2.97         | 86.40±3.20   | 5.15     | <0.001   |

CA, corrected age; WHO, World Health Organization; SD, standard deviation.
