# Supplementary material for: Postnatal growth of preterm infants during the first two years of life: catch-up growth accompanied by risk of overweight
Source: Springer Nature journal article supplement (doi:10.1186/s13052-021-01019-2), 2021-03-16
Supplement: MOESM2 [file 18971888]

**Additional file 2. Covariates associated with growth velocity of preterm infants**

| Factors                    | Weight z-score change |          | Length/height z-score change |          |
|----------------------------|-----------------------|----------|------------------------------|----------|
|                            | $\beta$ (95%CI)       | <i>P</i> | $\beta$ (95%CI)              | <i>P</i> |
| Gestational age            | 0.08 (0.07-0.09)      | <0.001   | 0.09 (0.08-0.09)             | <0.001   |
| Birth weight z-score       | 1.96 (1.90-2.03)      | <0.001   | 1.76 (1.69-1.83)             | <0.001   |
| Gender                     | -0.05 (-0.08-0.03)    | <0.001   | 0.03 (-0.00-0.05)            | 0.061    |
| Intrauterine growth status | 0.28 (0.24-0.33)      | <0.001   | 0.23 (0.19-0.29)             | <0.001   |

CI, confidence interval.
