# Supplementary material for: Postnatal growth of preterm infants during the first two years of life: catch-up growth accompanied by risk of overweight
Source: Springer Nature journal article supplement (doi:10.1186/s13052-021-01019-2), 2021-03-16
Supplement: MOESM3 [file 18971888]

**Additional file 3. Body weight and length/height z-scores of SGA, AGA, and LGA infants from CA 40 weeks to 24 months (mean ± SD)**

| Age          | Weight     |           |           | Length/height |           |           |
|--------------|------------|-----------|-----------|---------------|-----------|-----------|
|              | SGA        | AGA       | LGA       | SGA           | AGA       | LGA       |
| CA 40 weeks  | -0.83±1.23 | 0.79±1.15 | 1.92±1.07 | -1.06±1.27    | 0.57±1.23 | 1.77±1.25 |
| CA 3 months  | -0.48±1.12 | 0.88±1.02 | 1.69±0.94 | -0.73±1.18    | 0.63±1.08 | 1.46±1.03 |
| CA 6 months  | -0.34±1.04 | 0.80±0.99 | 1.48±1.00 | -0.47±1.12    | 0.64±1.03 | 1.39±1.08 |
| CA 9 months  | -0.24±0.98 | 0.69±0.96 | 1.30±0.94 | -0.37±1.14    | 0.56±1.02 | 1.22±1.04 |
| CA 12 months | -0.20±0.94 | 0.64±0.93 | 1.24±0.86 | -0.39±1.06    | 0.49±1.00 | 1.09±1.01 |
| CA 18 months | -0.31±0.90 | 0.48±0.87 | 1.00±0.90 | -0.36±1.16    | 0.39±1.01 | 0.98±1.09 |
| CA 24 months | -0.05±0.92 | 0.50±0.87 | 0.96±0.92 | -0.02±1.12    | 0.44±0.96 | 0.90±1.00 |

CA, corrected age; SGA, small for gestational age; AGA, appropriate for gestational age; LGA, large for gestational age; SD, standard deviation.
